# Supplementary material
Source: PubMed Central journal article supplement (PMC2765260)
Supplement: djp309_1.pdf [file djp309_1.pdf]

**A**

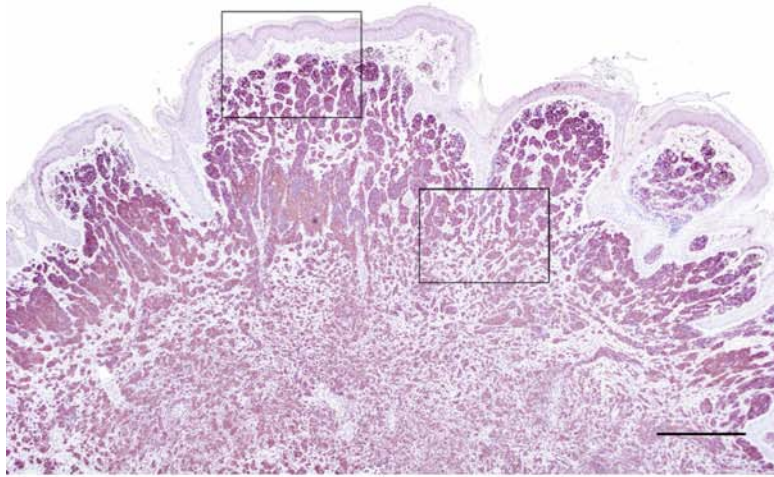

**B**

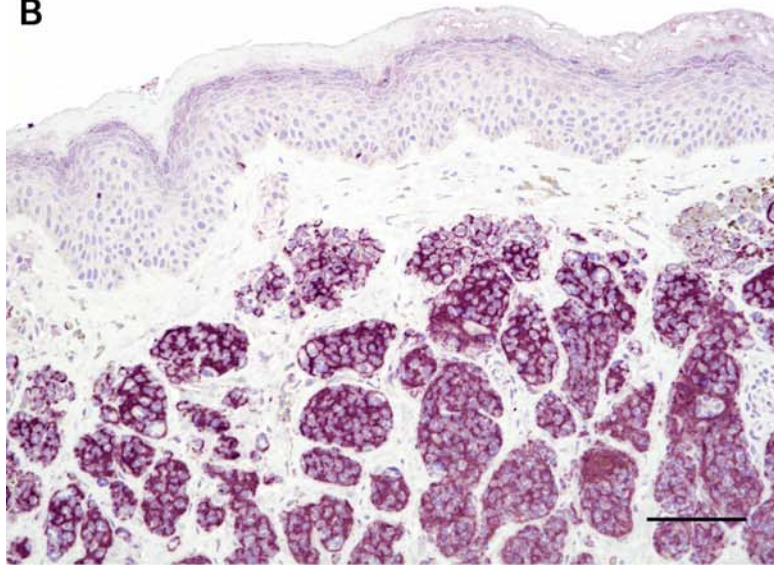

**C**

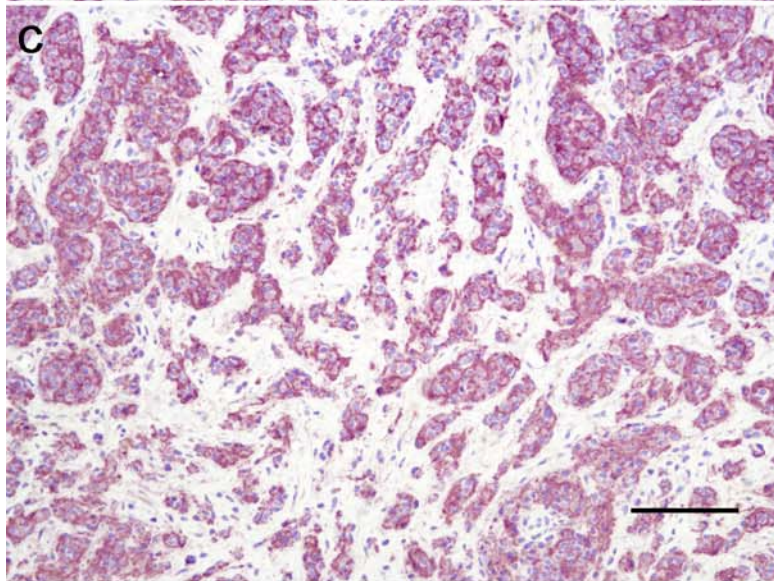

**Supplementary Figure 1. High molecular weight-melanoma-associated antigen (HMW-MAA) expression in acquired melanocytic nevus (AMN). A)**

Immunohistochemical staining of an acquired melanocytic nevus lesion. Staining with a combination of the three anti-HMW-MAA-specific monoclonal antibodies (763.74, VF1-TP41.2 and VT80.12, each at the concentration of 0.5 mg/ml) followed by the CSA II System (CSA II, Biotin-Free Catalyzed Amplification System; DakoCytomation, Carpinteria, CA) showed extensive expression of HMW-MAA on the membranes of nevus cells. Expression was not detected on normal melanocytes in the basal cell layer of the epidermis. **B-C)** Enlarged images of the boxed areas in (A). (in A, bar = 1 mm; in B and C, bar = 200  $\mu$ m.)
